# Supplementary material
Source: PubMed Central journal article supplement (PMC4734570)
Supplement: supp_pp.15.01598_PP2015-01598DR1_Supplemental_Material.pdf [file supp_pp.15.01598_PP2015-01598DR1_Supplemental_Material.pdf]

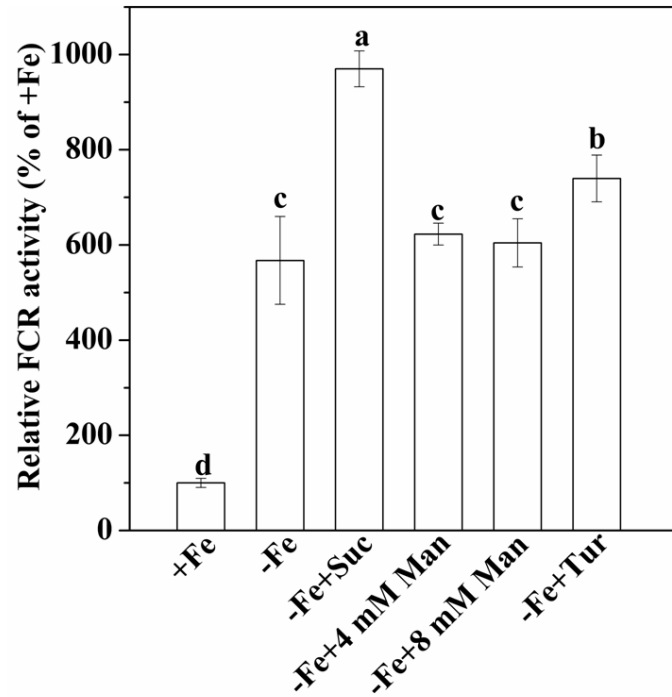

**Figure S1** Effects of Suc, mannitol and turanose on the activity of root ferric chelate reductase (FCR) in *Col-0 Arabidopsis*. The 5-week-old plants were cultured in either complete (+ Fe) or Fe-free (- Fe) nutrient solution. On day 3, the above nutrient solutions were supplied with or without 2 mM Suc , 4 mM or 8 mM mannitol (Man), or 2 mM turanose (Tur). Then, the plants were continuously grown for 24 h. Data are means  $\pm$  SD (n=4). Different letters indicate significant differences among treatments (one-way ANOVA,  $P < 0.05$ ).

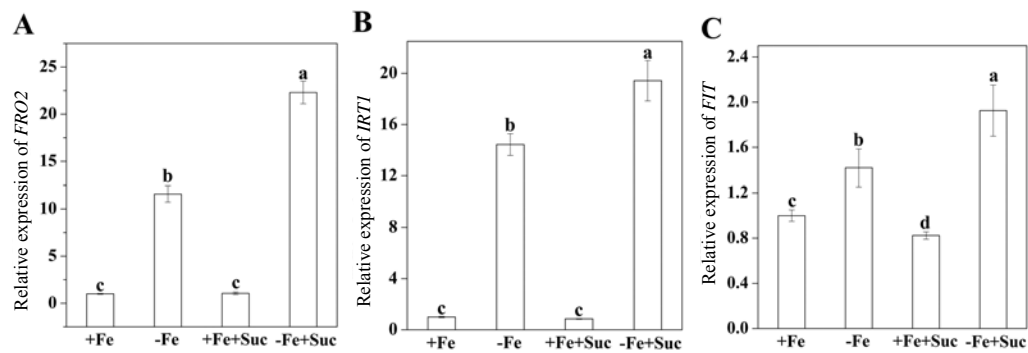

**Figure S2** Effect of exogenous Suc on expression of *FRO2* (A), *IRT1* (B) and *FIT* (C) in the roots of *Col-0* plants. The 5-week-old plants were grown in a Fe-free (- Fe) nutrient solution. On day 3, the above nutrient solutions were supplied with or without 2 mM Suc, and the plants were continuously grown for 24 h. Gene expression was analyzed by real-time qPCR. Transcript level of *UBQ10* was used as an internal control. Data are means  $\pm$  SD (n=5-7). Different letters indicate significant differences among treatments (one-way ANOVA,  $P < 0.05$ ).

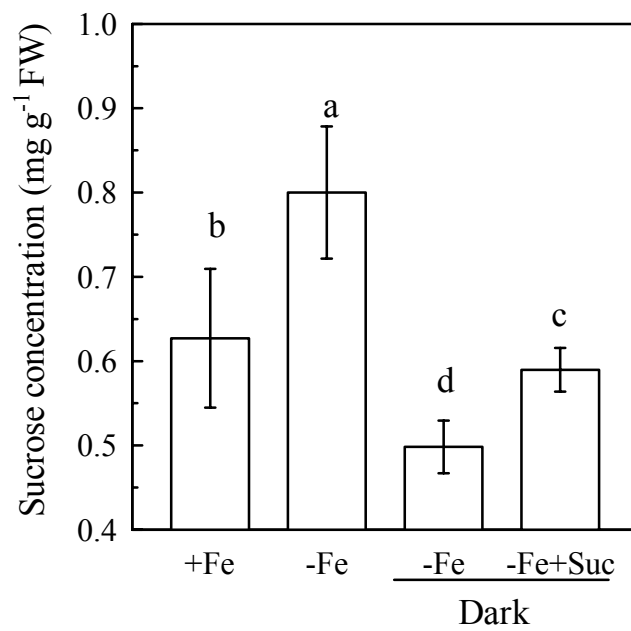

**Figure S3** Effects of dark treatment and exogenous Suc application on the sucrose concentration in roots of *Col-0 Arabidopsis* plants. The plants were treated as in Fig. 3. Data are means  $\pm$  SD (n=4). Different letters indicate significant differences among treatments (one-way ANOVA,  $P < 0.05$ ).

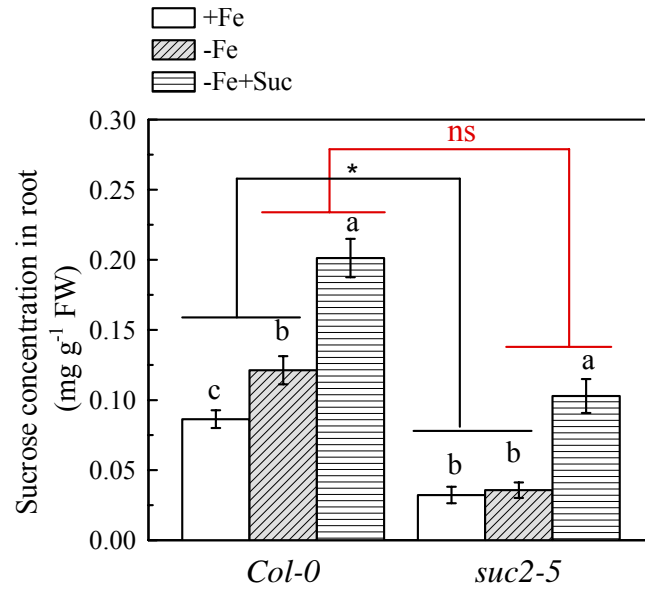

**Figure S4** Effect of exogenous Suc application on the Suc concentration in roots of *Col-0* plants and the *suc2-5* mutants. The indicated plants were treated as in Fig. 4. Data are means  $\pm$  SD (n=4). Different letters indicate significant differences among treatments with in a genotype (one-way ANOVA,  $P < 0.05$ ). Asterisk and ns indicate that the genotype by treatment interactions are significant and not significant, respectively (two-way ANOVA,  $P < 0.05$ ).

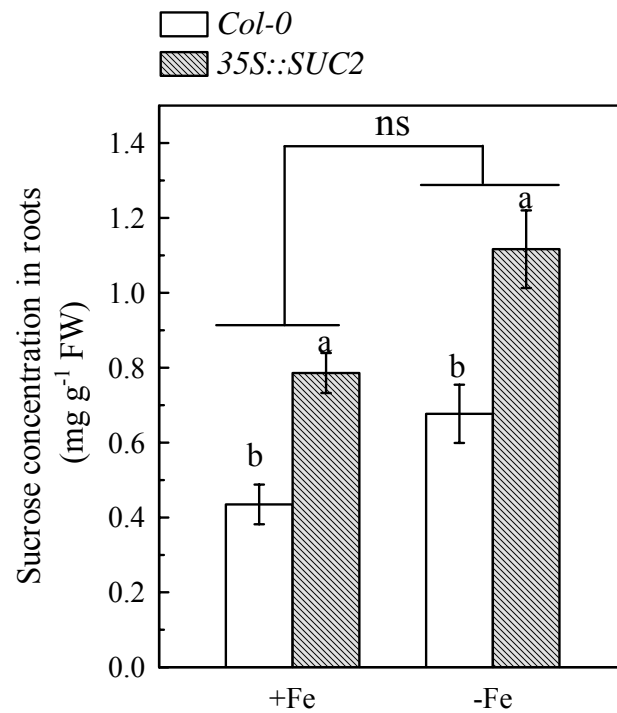

**Figure S5** Effect of Fe-deficiency on the sucrose concentration in roots of *Col-0* and *35S::SUC2* transgenic plants. The indicated plants were treated as in Fig. 1. Data are means  $\pm$  SD (n=4). Different letters indicate significant differences between two treatments with in a genotype (one-way ANOVA,  $P < 0.05$ ). The ns indicates that genotype by treatment interaction is not significant (two-way ANOVA,  $P < 0.05$ ).

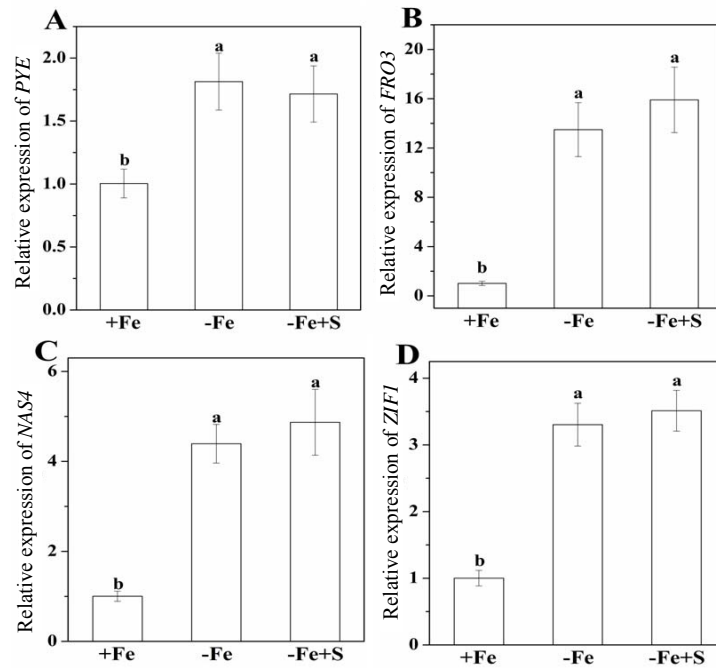

**Figure S6** Effects of exogenous sucrose on expression of *PYE* (A), *FRO3* (B), *NAS4* (C) and *ZIF1* (D) in the roots of *Col-0* plants. The 5-week-old plants were grown in a Fe-free (- Fe) nutrient solution. On day 3, the above nutrient solutions were supplied with or without 2 mM Suc, and the plants were continuously grown for 24 h. Gene expression was analyzed by real-time qPCR. Transcript level of *UBQ10* was used as an internal control. Data are means  $\pm$  SD (n=5-7). Different letters indicate significant differences among treatments (one-way ANOVA,  $P < 0.05$ ).

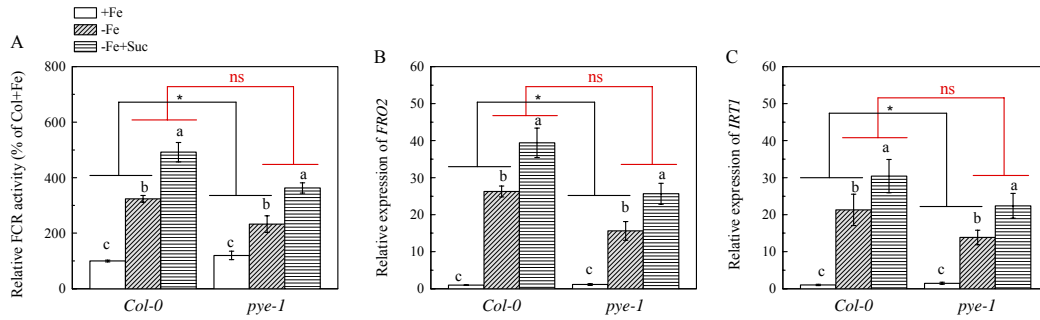

**Figure S7** Effects of Suc on Fe-deficiency-induced responses in the roots of *Col-0* plants and *pye-1* mutants. The treatments are the same as those in Figure S6. (A) Relative ferric chelate reductase (FCR) activity. (B-C) Expression of *FRO2* and *IRT1*. Transcript level of *UBQ10* was used as an internal control for Gene expression. Data are means  $\pm$ SD (n=5-7). Different letters indicate significant differences among treatments with in a genotype (one-way ANOVA,  $P < 0.05$ ). Asterisk and ns indicate that the genotype by treatment interactions are significant and not significant, respectively (two-way ANOVA,  $P < 0.05$ ).

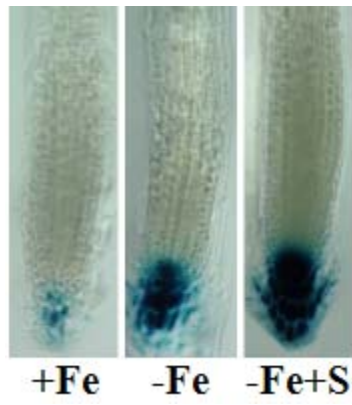

**Figure S8** Effects of Fe-deficiency and exogenous Suc application on GUS staining in the roots of *DR5-GUS* transgenic plants. The plants were treated as in Fig. 2C.



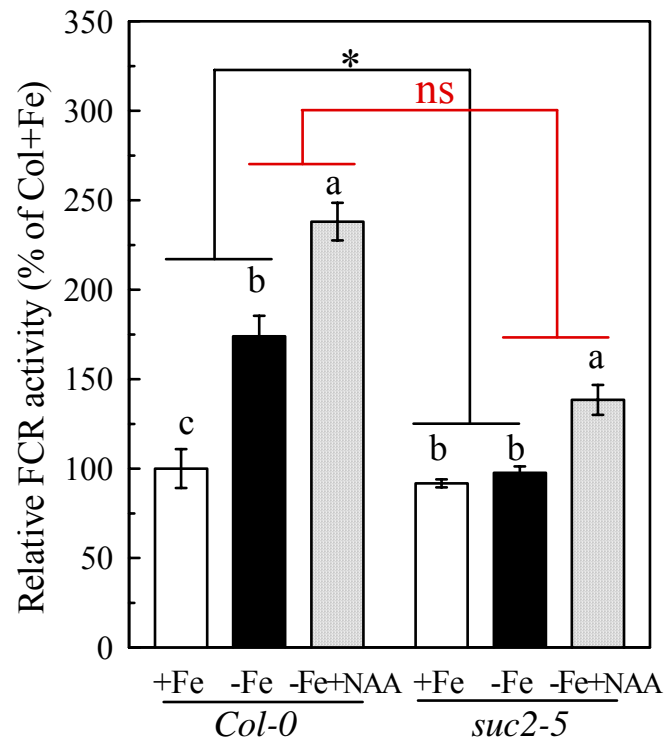

**Figure S9** Effect of the NAA treatment on root ferric chelate reductase (FCR) activity in Col-0 plants and the *suc2-5* mutants. The 20-day-old plants were transferred to either complete (+Fe) or Fe-free (- Fe) agar medium supplied with or without 0.1  $\mu$ M NAA for 4 days. Data are means  $\pm$  SD (n=5). Different letters indicate significant differences among treatments with in a genotype (one-way ANOVA,  $P < 0.05$ ). Asterisk and ns indicate that the genotype by treatment interactions are significant and not significant, respectively (two-way ANOVA,  $P < 0.05$ ).

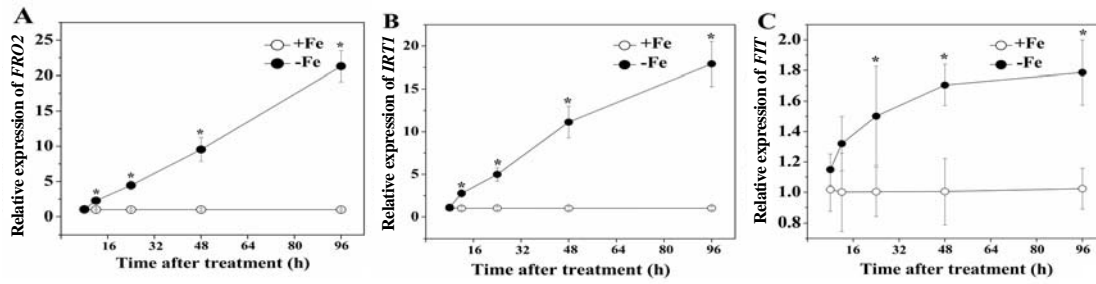

**Figure S10** Time-course expression of Fe-deficiency-responsive genes in the roots of Col-0 plants. The 5-week-old plants were grown in either complete (+ Fe) or Fe-free (- Fe) nutrient solutions. The expression of *FRO2* (A), *IRT1* (B) and *FIT* (C) were analyzed at 8 h, 12 h, 24 h, 48 h, and 96 h after each treatment. Data are means  $\pm$  SD (n = 4-7). Gene expression was analyzed by real-time qPCR. Transcript level of *UBQ10* was used as an internal control. An asterisk indicates significant difference between two treatments at each time point (one-way ANOVA,  $P < 0.05$ ).

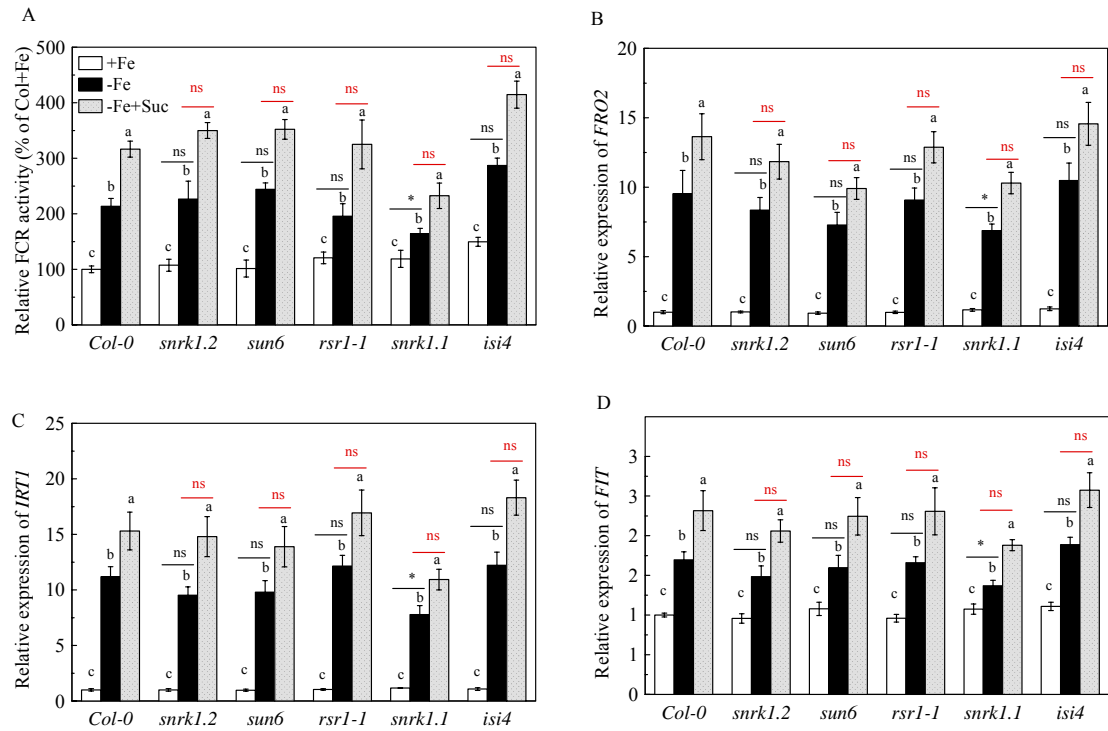

**Figure S11** Effects of sucrose on Fe-deficiency responses in the roots of Col-0 plants and sucrose-sensing mutants. The treatments are the same as those in Fig S6. Data are means  $\pm$ SD ( $n=5-7$ ). Different letters indicate significant differences among treatments within a genotype (one-way ANOVA,  $P < 0.05$ ). Asterisk and ns indicate significant differences and no significant differences between mutant and Col-0 genotypes, respectively, in response to a treatment (two-way ANOVA,  $P < 0.05$ ).

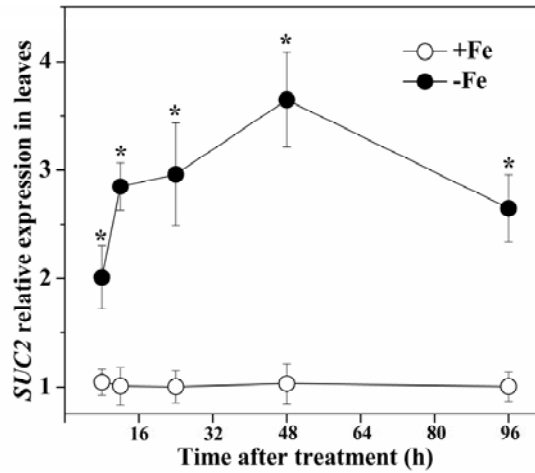

**Figure S12** Time-course effect of Fe deficiency on *AtSUC2* expression in the leaves of *Col-0* plants. The treatments are the same as those in Fig. S10. Gene expression was analyzed by real-time qPCR. Transcript level of *UBQ10* was used as an internal control. Data are means  $\pm$ SD (n=5-7). An asterisk indicates significant difference between two treatments at each time point (one-way ANOVA,  $p < 0.05$ ).

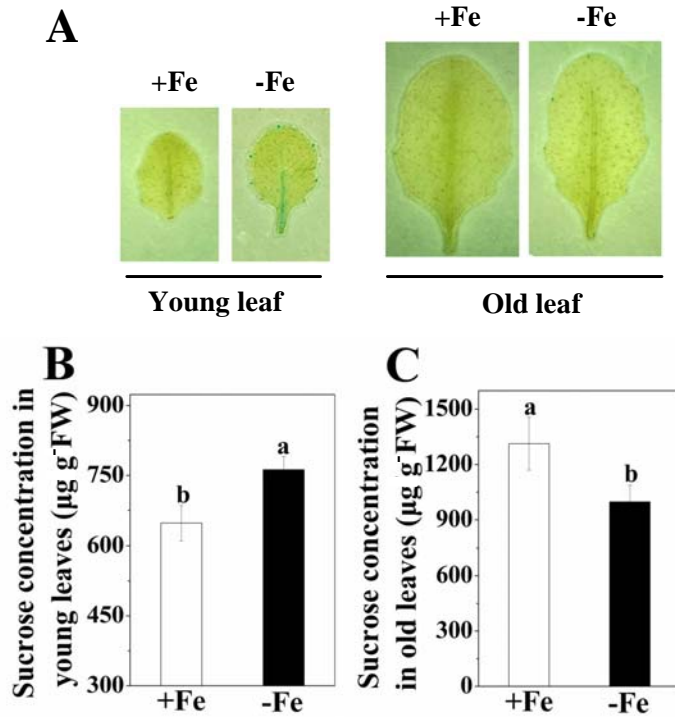

**Figure S13** Effects of Fe deficiency on GUS staining and Suc concentration in *DR5-GUS* transgenic plants. The treatments are the same as those in Fig. S5. Data are means  $\pm$  SD ( $n=4$ ). Different letters indicate significant differences between two treatments (one-way ANOVA,  $P < 0.05$ ).

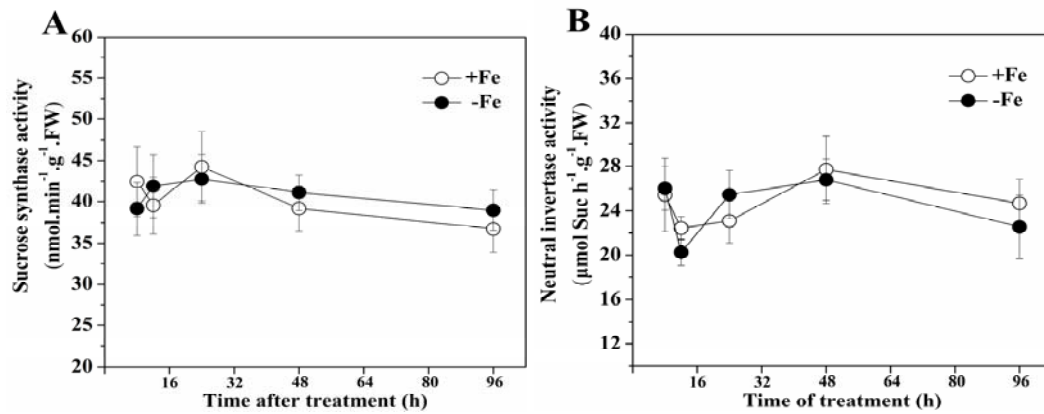

**Figure S14** Effects of Fe deficiency on the activities of sucrose synthase (A) and neutral invertase (B) in the roots of *Col-0* Arabidopsis. The treatments are the same as those in Fig. S10. Data are means  $\pm$  SD (n=4). One-way ANOVA test ( $P < 0.05$ ) shows that there is no significant difference between two treatments at each time point.

**Supplemental table S1.** Primers used in this work.

| Gene             | Primer         | Sequence (5'-3')        | Method         |
|------------------|----------------|-------------------------|----------------|
| AT4G05320        | UBQ10 F        | ACCCTAACGGGAAAGACGA     | Real-time qPCR |
|                  | UBQ10 R        | GGAGCCTGAGAACAAGATGAA   |                |
| AT1G01580        | FRO2 F         | GCGACTTGTAGTGCGGCTATG   | Real-time qPCR |
|                  | FRO2 R         | CGTTGCACGAGCGATTCTTG    |                |
| AT4G19690        | IRT1 F         | CGGTTGGACTTCTAAATGC     | Real-time qPCR |
|                  | IRT1 R         | CGATAATCGACATTCCACCG    |                |
| At2G28160        | FIT F          | GGAGAAGGTGTTGCTCCATC    | Real-time qPCR |
|                  | FIT R          | TCCGGAGAAGGAGAGCTTAG    |                |
| At1g22710        | SUC2 F         | TGCCTTTCACGATGACTGAG    | Real-time qPCR |
|                  | SUC2 R         | TTCCTTGAAAGCTCCGAAGA    |                |
| AT3G47640        | PYE F          | CAGGACTTCCCATTTTCCAA    | Real-time qPCR |
|                  | PYE R          | CTTGTGTCTGGGGATCAGGT    |                |
| AT1G23020        | FRO3 F         | TTCTTCCGACCTCTCAATGC    | Real-time qPCR |
|                  | FRO3 R         | TTTCTCTCGGGTGACAAAGG    |                |
| AT1G56430        | NAS4 F         | GGCTTCGACGTTGTGTTCTT    | Real-time qPCR |
|                  | NAS4 R         | AGCAAAGCACCAGGAGACAT    |                |
| AT5G13740        | ZIF1 F         | TTTGC ACTATGGGCTAACAGTC | Real-time qPCR |
|                  | ZIF1 R         | TGAAAAGAGAATAGGCCGAGA   |                |
| AT1G22710        | Salk_087046 LP | TTTACCTGAGGGACGACAATG   | Genotyping     |
|                  | Salk_087046 RP | GTTTTTCGGAGAAATCTTCGG   |                |
| AT3G29160        | Salk_139618 LP | GATTTTAACCCGCGGTATACC   | Genotyping     |
|                  | Salk_139618 RP | GAAAACTGACAAGAACCACCG   |                |
| pBIN-pROK2 T-DNA | Lab 1.3        | ATTTTGCCGATTTTCGGAAC    | Genotyping     |
